# Supplementary material for: Fermi resonance controlled product branching in the H + HOD reaction
Source: Royal Society of Chemistry journal article supplement (doi:10.1039/c8cp02279h), 2018-01-01
Supplement: c8cp02279h1.pdf [file c8cp02279h1.pdf]

**Electronic Supplementary Information for**

**Fermi Resonance Controlled Product Branching in the H+HOD reaction**

Bin Zhao<sup>1,2,\*</sup>, Uwe Manthe<sup>1</sup>, and Hua Guo<sup>2</sup>

*<sup>1</sup>Theoretische Chemie, Fakultät für Chemie, Universität Bielefeld, Universitätsstr. 25, D-33615*

*Bielefeld, Germany*

*<sup>2</sup>Department of Chemistry and Chemical Biology, University of New Mexico, Albuquerque, New*

*Mexico 87131, USA*

Results presented here are obtained by a reactant-coordinate based (RCB) method for state-to-state calculation<sup>1</sup> on the neural network fitted potential energy surface (PES) of the H<sub>3</sub>O system.<sup>2</sup> Parameters of the calculation are listed in Table S-I.

**Table S-I. Parameters used in the calculations for the HD + OH and H<sub>2</sub> + OH abstraction channels (Atomic units are used if not otherwise stated)**

| Initial wave packet                              |                                                                                                                                                               |                             |                                                     |     |
|--------------------------------------------------|---------------------------------------------------------------------------------------------------------------------------------------------------------------|-----------------------------|-----------------------------------------------------|-----|
| $R_0$                                            | 10.0                                                                                                                                                          |                             |                                                     |     |
| $\delta$                                         | 0.3                                                                                                                                                           |                             |                                                     |     |
| $k_0$                                            | $k_0 = \sqrt{2E_0\mu}$ with $E_0 = \begin{cases} 1.35 \text{ eV} & \text{for (000)} \\ 0.90 \text{ eV} & \text{for (010), (100) (020) and (001)} \end{cases}$ |                             |                                                     |     |
| Grid range and size for the reactant coordinates |                                                                                                                                                               |                             |                                                     |     |
| HD + OH channel                                  |                                                                                                                                                               | H <sub>2</sub> + OD channel |                                                     |     |
| $R$                                              | $R \in (0.4,16.0), N_R^1=96, N_R^2=120$                                                                                                                       |                             | $R \in (0.4,16.0), N_R^1=96, N_R^2=120$             |     |
| $r_1$                                            | $r_1 \in (0.7,12.0), \nu_{int}^1=96, \nu_{asy}^1=8$                                                                                                           |                             | $r_1 \in (0.7,12.0), \nu_{int}^1=80, \nu_{asy}^1=8$ |     |
| $r_2$                                            | $r_2 \in (0.7,5.0), \nu_{int}^2=\nu_{asy}^2=4$                                                                                                                |                             | $r_2 \in (0.7,5.0), \nu_{int}^2=\nu_{asy}^2=4$      |     |
| $j_1$                                            | $j_1 \in (0,100)$                                                                                                                                             |                             | $j_1 \in (0,100)$                                   |     |
| $j_2$                                            | $j_2 \in (0,20)$                                                                                                                                              |                             | $j_2 \in (0,20)$                                    |     |
| Grid range and size for the product coordinates  |                                                                                                                                                               |                             |                                                     |     |
| $r_1'$                                           | $r_1' \in (0.7,5.0), \nu_1'=4$                                                                                                                                |                             | $r_1' \in (0.7,5.0), \nu_1'=4$                      |     |
| $r_2'$                                           | $r_2' \in (0.7,5.0), \nu_2'=4$                                                                                                                                |                             | $r_2' \in (0.7,5.0), \nu_2'=4$                      |     |
| $j_1'$                                           | $j_1' \in (0,28)$                                                                                                                                             |                             | $j_1' \in (0,28)$                                   |     |
| $j_2'$                                           | $j_2' \in (0,20)$                                                                                                                                             |                             | $j_2' \in (0,20)$                                   |     |
| Product projection planes: $R_p^\infty=8.0$      |                                                                                                                                                               |                             |                                                     |     |
| Absorbing Potential                              |                                                                                                                                                               |                             |                                                     |     |
|                                                  | $C$                                                                                                                                                           | $x_s$                       | $x_e$                                               | $n$ |
| $R$                                              | 0.1                                                                                                                                                           | 12.2                        | 16.0                                                | 1.5 |
| $r_1$                                            | 0.045                                                                                                                                                         | 10.0                        | 12.0                                                | 1.5 |
| Total time/time step: 8000/10                    |                                                                                                                                                               |                             |                                                     |     |
| Flux plane: $r_1^{flux}=7.0$                     |                                                                                                                                                               |                             |                                                     |     |
| Partial waves: $J_{tot}=0\text{-}50$             |                                                                                                                                                               |                             |                                                     |     |
| Reactant helicity quantum number: (0-6)          |                                                                                                                                                               |                             |                                                     |     |
| Product helicity quantum number: (0-13)          |                                                                                                                                                               |                             |                                                     |     |

The initial wave packet is constructed as the direct product of an HOD eigenstate and a Gaussian wave packet in the translational coordinate  $R$  located in the reactant asymptote. The Gaussian wave packet is expressed in the following form,

$$G(R) = \left( \frac{1}{\pi\delta^2} \right)^{1/4} \exp \left[ -\frac{(R-R_0)^2}{2\delta^2} - ik_0 R \right], \quad (\text{S1})$$

where  $R_0$ ,  $\delta$ , and  $k_0$  are the central position, width, and momentum, respectively.

Absorbing potentials are used to prevent wave function reaching the boundary of grids and following form for  $x = R, r_1$  is used:

$$V_{abs}(x) = -iC \left( \frac{x-x_s}{x_e-x_s} \right)^n, \quad x_s \leq x \leq x_e, \quad (\text{S2})$$

where  $x_s$  and  $x_e$  denote the starting and ending positions of the absorbing potential, respectively,

$C$  is the strength parameter and  $n$  is the order of absorbing potential.

## References:

1. B. Zhao, Z. Sun and H. Guo, J. Chem. Phys. **145** (18), 184106 (2016).
2. J. Chen, X. Xu, X. Xu and D. H. Zhang, J. Chem. Phys **138** (15), 154301 (2013).
